# Supplementary material for: A comprehensive pan-cancer analysis revealing SPAG6 as a novel diagnostic, prognostic and immunological biomarker in tumor
Source: PubMed Central journal article supplement — Gland Surg. 2024 Jun 27;13(6):999–1015. doi: 10.21037/gs-24-157 (PMC11247597; doi:10.21037/gs-24-157), 2024-06-27
Supplement: gs-13-06-999-dss.pdf [file gs-13-06-999-dss.pdf]

## Data Sharing Statement

|                     |                                                                                                                                                     |                                                                                                                                                  |
|---------------------|-----------------------------------------------------------------------------------------------------------------------------------------------------|--------------------------------------------------------------------------------------------------------------------------------------------------|
| <b>Article Info</b> | <a href="https://dx.doi.org/10.21037/gs-24-157">https://dx.doi.org/10.21037/gs-24-157</a>                                                           |                                                                                                                                                  |
| <b>Item</b>         | <b>Question</b>                                                                                                                                     | <b>Authors' Response<br/>(place "-" if not applicable)</b>                                                                                       |
| 1                   | Would you like to share data collected for your study to others?                                                                                    | Yes                                                                                                                                              |
| 2                   | If not, would you like to share the reason for your decision?                                                                                       | -                                                                                                                                                |
| 3                   | What data in particular will be shared?                                                                                                             | All data in particular will be shared.                                                                                                           |
| 4                   | Any other documents will be shared? Such as study protocol, statistical analysis plan, informed consent form, clinical study report, analytic code. | Study protocol, statistical analysis plan will be shared.                                                                                        |
| 5                   | When will data availability begin?                                                                                                                  | From the publication date.                                                                                                                       |
| 6                   | When will data availability end?                                                                                                                    | Till all public data may be updated over time.                                                                                                   |
| 7                   | To whom will you share the data?                                                                                                                    | Medical oncologists and surgeons who are interested in studies of SPAG6.                                                                         |
| 8                   | For what type of analysis or purpose?                                                                                                               | For analysis the effect of SPAG6 in cancer patients.                                                                                             |
| 9                   | How or where can the data/documents be obtained?                                                                                                    | Emails could be sent to the address below to obtain the shared data:<br><a href="mailto:zhangdaogong1978@163.com">zhangdaogong1978@163.com</a> . |
| 10                  | Any other restrictions?                                                                                                                             | We may balance the potential benefits and risks for each request and then provide the data that could be shared.                                 |
